# Supplementary material
Source: publisher figshare collection journal article supplement (https://tandf.figshare.com/ndownloader/files/21990507)
Supplement: Supplementary file 1 [file 21990507]

## An overview of dropped hock syndrome cases in New Zealand cattle

IA Topham<sup>\*‡</sup>, KE Dittmer<sup>\*</sup>, KN Buckle<sup>†</sup>, MC Gates<sup>\*§</sup>

<sup>\*</sup>School of Veterinary Science, Massey University, Palmerston North, New Zealand <sup>4442</sup>

<sup>†</sup>Ministry for Primary Industries, 66 Ward Street, Upper Hutt 5140, PO Box 40-742

<sup>‡</sup>Current address: c/o 1021 Rakahouka-Hedgehope Road, RD2, Hedgehope 9872

<sup>§</sup> Author for correspondence. Email: c.gates@massey.ac.nz

---

### Supplementary Information 1. Data collection.

All available data sets were collated and categorised by year. Data types included questionnaire data (29/47 outbreaks; 61%), photographs (17/47 outbreaks; 36%), video footage (23/47 outbreaks; 49%), history (15/47 outbreaks; 32%), MPI summary data (9/47 outbreaks; 19%), post mortem examination results (26/47 outbreaks), and other anecdotal information (11/47 outbreaks; 23%). A copy of the MPI questionnaire form is provided as Supplementary Table 1. Photographs and video footage, where available, were converted to, and stored as, a numeric grade within the data frame. Qualitative post mortem examination data and supplementary history information were stored as text files.

A physical examination was performed by the attending veterinarian on at least one of the affected animals in each event. This information was recorded variously in MPI case notes, formal survey responses, photographs, and video footage. In most cases, in addition to the attending veterinarian, the attending MPI outbreak investigator also assessed video footage and photographs of at least one of the animals for comparison with the MPI case definition. Commonly, for outbreaks involving more than a couple of animals, the majority of cows were assessed by distance examination alone. In some cases, primarily those cases in which the veterinarian or a colleague had previously attended an outbreak, video footage and photographs were not obtained, and the diagnosis was made based on the findings of the attending veterinarian alone.

#### *Data cleaning and processing*

The data tables were imported into R statistical software (R-Development-Core-Team 2018) for cleaning and analysis. Any data entry errors were identified, checked against the data source, and corrected as required. MPI questionnaires were available for 29/47 outbreak events, where events are defined as individual outbreaks (cases clustered together in space and time). Outbreaks on the same farm in separate years are considered separate events. In four outbreak events, supplementary

history detail was supplied in free text comments on the survey responses, and via email and phone communications.

#### *Questionnaire data*

The data from the questionnaires were divided into four levels; (1) farm level data, (2) season level data, (3) mob level management data, and (4) individual cow data.

Farm level data included (1) Unique farm identifier, (2) farm name, (3) farm contact person, (4) farm address, (5) run-off address, (6) contact numbers, (7) NAIT number, (8) contact email, (9) farm area (effective Ha), (10) farm contour (steep/steep-to-rolling/rolling-to-flat/flat), (11) farm district, divided according to the 53 New Zealand administrative districts, and (12) farm region, divided according to the 17 administrative regions of New Zealand.

Season level data included (1) unique event identifier, (2) attending veterinarian's name, contact number, email address, and veterinary practice, (3) number of cows in the herd for the season, (4) number of first calving heifers entering the herd, (5) planned start of calving (PSC), (6) planned start of mating, (7) whether solely spring/autumn or year-round calving, (8) date of first case in outbreak, (9) date questionnaire was filled, (10) number of affected cows in the outbreak, and (11) whether there had been any previous cases on the farm.

Mob level data included (1) survey present y/n, (2) recent anthelmintic, vaccine, tick, bloat, and monensin treatment information, (3) copper, selenium, cobalt, iodine, zinc, phosphorus, magnesium, and calcium supplementation information, (4) feed type, quantity and quality prior to and at time of disease, and (5) potential stressor exposures. Potential stressor exposures prior to disease were empirically reported by farmers and vets in response to both the survey and direct inquiry from the MPI hotline.

Cow level history and clinical sign variables included post mortem examination, histopathology, biochemistry, haematology, trace element, and other laboratory testing. The presence or absence of the following clinical signs was also recorded: (1) progressive hind limb weakness, (2) both back legs affected, (3) shortened gait, (4) ataxia/wobbly on back legs, (5) dropped hocks and knuckled fetlocks, (6) flaccid tail, and (7) normal urination/defecation. Body condition scores (BCS) were recorded on a scale of 1 to 9 according to the DairyNZ guidelines. A summary of the data available for cow-level history details is provided in Supplementary Table 2.

#### *Biochemistry and haematology data*

A general biochemistry panel was submitted to New Zealand Veterinary Pathology or Gribbles Veterinary Pathology for 15/181 cows. In one cow, an in-house VetScan panel was performed at the referring clinic. Serum aspartate aminotransferase (AST) and creatinine kinase (CK) activity were

tested in an additional 6 cows. Haematology testing was submitted to either New Zealand Veterinary Pathology or Gribbles Veterinary Pathology in 14/181 cows. Further details are provided in Supplementary Tables 3 and 4.

#### *Trace elements data*

Blood and liver trace element testing for copper, selenium, iodine, and iron were variably available from 29/181 cows. With one exception, the data were obtained from Gribbles Veterinary Pathology test reports. In one case, the data was reported from the attending veterinarian as being “within the normal range”. Further details are provided in Supplementary Table 5.

#### *Infectious disease serology and PCR data*

*Leptospira* PCR test results were available in 2/181 cows; *Leptospira borgpetersenii* serovar Hardjo microscopic agglutination test (MAT) in 4/181 cows; *Leptospira interrogans* serovar Pomona MAT in 3/181 cows; bovine viral diarrhoea virus (BVDV) antigen ELISA in 6/181 cows; and BVDV antibody ELISA in 4/181 cows. All testing was performed at Gribbles Veterinary Pathology (Dunedin).

#### *Other Testing*

Serum nitrate concentration was tested in 6/18 cows; blood lead in 4/181 cows; serum vitamin B12 in 6/181 cows; and vitamin E in 4/181 cows. Testing was performed at Gribbles Veterinary Pathology (Dunedin).

#### *Post-mortem examination data*

Of the 181 cows with identification, 18 had partial or full post mortem examinations performed. Of these, most were performed by the attending veterinarian, and some by pathologists from MPI or Massey University. An additional eight post mortem examination reports were available for animals without identification. The examination results indicate that these eight unknown cows were separate cows to the 16 with identification. It is not known whether any of these results correspond to the 165 cows without linked post mortem examination reports. Earlier post mortem examinations focused primarily on the nervous system; dissections of the muscles were not performed in all cases. A report of a single pathologist's examination and interpretation of nine unidentified cases, seen between 2012 and 2013, summarises the data from a further group of unidentified cases, which likely includes some of the eight individual unidentified cow reports. These unidentified cow data, along with associated histology data, have been kept separate to avoid error in the case that cows contribute to multiple sets. The data were entered from two types of record; MPI summary tables, which comprise the name of the finding and a binary yes/no, and from full histology reports.

---

*Histopathology data*

Histopathology data were available in 15/181 identified cows. Three more animals were recorded as having samples taken for histology, but no report matching these animals was available. Eight histology reports were also available from unidentified animals, which may include the three animals with no reports attached. Nine unidentified cows also contributed to a report by a single pathologist on histology from cases over 2012 and 2013. Histology tissue sample sets range from limited hind limb neural samples to a full range of visceral and non-visceral tissues, including brain. The data were entered from two types of record; MPI summary tables, which comprise the name of the finding and a binary yes/no, and full written histology reports.

**Supplementary Table 1. MPI Questionnaire.****FARMER CONTACT DETAILS**

|                       |  |              |  |
|-----------------------|--|--------------|--|
| Contact person's name |  |              |  |
| Farm address          |  |              |  |
| Farms On Line number  |  |              |  |
| NAIT number           |  |              |  |
| Nearest town/city     |  |              |  |
| Phone No              |  | Mobile phone |  |
| E-mail                |  |              |  |

**Farm details**

|                                                                    |                |                   |                  |             |    |
|--------------------------------------------------------------------|----------------|-------------------|------------------|-------------|----|
| What is the effective area of the dairy farm?                      |                |                   |                  |             | ha |
| What numbers of cows are milked?                                   |                |                   |                  |             |    |
| When is the planned start of calving                               |                |                   |                  |             |    |
| When is the planned start of mating                                |                |                   |                  |             |    |
| How would you best describe your dairy set-up? (tick only one box) |                |                   |                  |             |    |
| Totally spring calving herd                                        |                |                   |                  |             |    |
| Totally autumn calving                                             |                |                   |                  |             |    |
| Run a mix of spring calving and autumn calving herds               |                |                   |                  |             |    |
| What is the contour of your farm? Circle which applies             |                |                   |                  |             |    |
| Mostly steep                                                       | Mostly rolling | Mix steep/rolling | Mix rolling/flat | Mostly flat |    |

**History and diagnosis**

|                                                                           |        |   |  |
|---------------------------------------------------------------------------|--------|---|--|
| What date was this case of sciatic palsy seen?                            | /      | / |  |
| What date was this questionnaire completed?                               | /      | / |  |
| On this farm how many other cattle have been affected with sciatic palsy? |        |   |  |
| What signs were seen in the affected animal? (circle all selections)      |        |   |  |
| Progressive hind limb weakness                                            | Yes/No |   |  |
| Both back legs affected but differing severity                            | Yes/No |   |  |
| Shortened gait                                                            | Yes/No |   |  |
| Ataxia, wobbly on back legs                                               | Yes/No |   |  |
| Dropped hocks and knuckled fetlocks                                       | Yes/No |   |  |
| Tail can be flaccid                                                       | Yes/No |   |  |
| Defaecation and urination normal                                          | Yes/No |   |  |
| Blood calcium/magnesium/phosphorus levels normal                          | Yes/No |   |  |

**History details**

|                                                                                |      |          |      |           |        |
|--------------------------------------------------------------------------------|------|----------|------|-----------|--------|
| Cow ID                                                                         |      |          |      |           |        |
| Is the cow homebred?                                                           |      |          |      |           | Yes/No |
| If purchased what date did the cow arrive                                      |      |          | / /  |           |        |
| What is the age of the affected cow?                                           |      |          |      |           | mths   |
| What is the weight of the affected cow?                                        |      |          |      |           | kg     |
| What body condition score is the cow                                           |      |          |      |           |        |
| What is the breed of the affected cow?                                         |      |          |      |           |        |
| What date did the affected cow calve                                           |      |          |      |           | / /    |
| Has the cow recently been seen bulling?                                        |      |          |      |           | Yes/No |
| Are there fresh rub marks on the cow?                                          |      |          |      |           | Yes/No |
| Are there bulls running with the herd?                                         |      |          |      |           | Yes/No |
| Describe the health of the cow in last month before sciatic palsy (circle one) |      |          |      |           |        |
| Excellent                                                                      | Good | Adequate | Poor | Very poor |        |

|                                                         |        |              |     |                |        |
|---------------------------------------------------------|--------|--------------|-----|----------------|--------|
| What date did the affected cow calve                    |        |              |     |                | / /    |
| Was the last calving assisted?                          |        |              |     |                | Yes/No |
| Was the cow treated for a metabolic condition?          |        |              |     |                | Yes/No |
| If yes what date?                                       |        |              | / / |                |        |
| If yes what treatments were given?                      |        |              |     |                |        |
| Was the cow down for any period of time after calving?  |        |              |     |                | Yes/No |
| Has the cow been treated for mastitis?                  | Yes/No | If yes date? | /   | /              |        |
| Has the cow been treated for metritis?                  | Yes/No | If yes date? | /   | /              |        |
| Any other illnesses treated?                            | Yes/No | If yes date? | /   | /              |        |
| Has milk production fallen off before palsy started?    |        |              |     |                | Yes/No |
| Has the cow been given any treatment for sciatic palsy? |        |              |     |                | Yes/No |
| If yes what treatment was used?                         |        |              |     |                |        |
| Was there any sustained response to treatment?          |        |              |     | Good/Some/None |        |

**Was the affected cow recently wormed?**

|                                                                                           |                      |        |
|-------------------------------------------------------------------------------------------|----------------------|--------|
| Were the affected cattle recently wormed?                                                 |                      | Yes/No |
| If yes please list the anthelmintic treatments given and the date of their administration |                      |        |
| Date of anthelmintic treatment                                                            | Name of product used |        |
| / /                                                                                       |                      |        |
| / /                                                                                       |                      |        |

**Was the affected cow recently vaccinated?**

|                                                                                |                      |
|--------------------------------------------------------------------------------|----------------------|
| Were the affected cattle recently vaccinated?                                  | Yes/No               |
| If yes please list the vaccinations given and the date of their administration |                      |
| Date of vaccine treatment                                                      | Name of product used |
| / /                                                                            |                      |
| / /                                                                            |                      |

**Was the affected cow recently treated for ticks?**

|                                                                                   |                      |
|-----------------------------------------------------------------------------------|----------------------|
| Were the affected cattle recently treated for ticks?                              | Yes/No               |
| If yes please list the tick treatments given and the date of their administration |                      |
| Date of tick treatment                                                            | Name of product used |
| / /                                                                               |                      |
| / /                                                                               |                      |

**Was the affected cow recently given mineral supplements (copper, selenium, cobalt)**

|                                                                                                       |                      |
|-------------------------------------------------------------------------------------------------------|----------------------|
| Were the affected cattle recently given mineral treatments?                                           | Yes/No               |
| If mineral supplements were given please list what products were used and when they were administered |                      |
| Date of mineral treatment                                                                             | Name of product used |
| / /                                                                                                   |                      |
| / /                                                                                                   |                      |
| / /                                                                                                   |                      |

**Pasture quality**

|                                                                                  |      |      |         |      |         |
|----------------------------------------------------------------------------------|------|------|---------|------|---------|
| How would you describe the recent pasture quality? Please circle one on each row |      |      |         |      |         |
| Paddock of disease outbreak                                                      | lush | good | average | poor | ruddish |
| Previous paddock                                                                 | lush | good | average | poor | ruddish |

**Supplementary feeding**

|                                                                       |                |            |
|-----------------------------------------------------------------------|----------------|------------|
| Was the affected cow receiving supplementary feeding?                 | Yes/No         |            |
| Please list what supplements are currently being fed and when started |                |            |
| Date first fed                                                        | Supplement fed | Feed rate  |
| / /                                                                   |                | kg/cow/day |

**Supplementary feed quality**

| How would you describe the supplementary feed quality? Please circle |      |         |      |         |
|----------------------------------------------------------------------|------|---------|------|---------|
|                                                                      | good | average | poor | ruddish |
|                                                                      | good | average | poor | ruddish |
|                                                                      | good | average | poor | ruddish |

**Additional treatments**

| Was the affected cow receiving any additional medication? (you may tick more than one box) and date when started treatment |         |      |  |
|----------------------------------------------------------------------------------------------------------------------------|---------|------|--|
| Zinc sulphate in the water for facial eczema prevention                                                                    |         | Date |  |
| Zinc oxide drenches for facial eczema prevention                                                                           |         | Date |  |
| Time capsule boluses for facial eczema prevention                                                                          |         | Date |  |
| Bloat treatment in the water                                                                                               |         | Date |  |
| Rumensin treatment in the water                                                                                            |         | Date |  |
| Other                                                                                                                      | Specify | Date |  |

**Stressful incidents**

| Did the cow experience any additional stresses in the last month such as a water shortage, dehorning, transportation, blood testing, weighing? |                      | Yes/No |
|------------------------------------------------------------------------------------------------------------------------------------------------|----------------------|--------|
| Date of stressful event                                                                                                                        | Stressful experience |        |
| / /                                                                                                                                            |                      |        |
| / /                                                                                                                                            |                      |        |
| / /                                                                                                                                            |                      |        |

**Genetics**

| Details from MINDA |  |
|--------------------|--|
| Birth ID           |  |
| Breed code         |  |

**Farmer opinion**

| We would be very interested in your opinion as to what you think may have caused this cow to get sciatic palsy |
|----------------------------------------------------------------------------------------------------------------|
|                                                                                                                |



**Supplementary Table 2. Summary of the availability of cow-level history details for the 181 cases of Dropped Hock Syndrome in New Zealand from October 2012 to August 2017.**

| Variable                              | Levels                                                               | Number (%)Cows with data |
|---------------------------------------|----------------------------------------------------------------------|--------------------------|
| Home bred v Imported                  |                                                                      | 66 (36.5%)               |
| Import Date                           |                                                                      | 3 (1.7%)                 |
| Age                                   |                                                                      | 86 (47.5%)               |
| Weight                                |                                                                      | 68 (37.6%)               |
| BCS prior to disease*                 | 1-9                                                                  | 77 (42.5%)               |
| BCS after/during disease*             | 1-9                                                                  | 21 (11.6%)               |
| Breed                                 | Jersey, Friesian, Kiwi Cross (Mixed Jersey/Friesian breeding), Angus | 94 (51.9%)               |
| Calving date                          |                                                                      | 42 (23.2%)               |
| Bulling                               | Y/N                                                                  | 74 (40.9%)               |
| Rub marks                             | Y/N                                                                  | 76 (42.0%)               |
| Bulls in with cows                    | Y/N                                                                  | 65 (35.9%)               |
| Cow health prior to disease           | Very good, Good, Average, Poor, Very poor                            | 73 (40.3%)               |
| Assisted calving                      | Y/N                                                                  | 33 (18.2%)               |
| Calf born dead                        | Y/N                                                                  | 3 (1.7%)                 |
| Metabolic disease treatment           | Y/N                                                                  | 40 (22.1%)               |
| Cow Down                              | Y/N                                                                  | 40 (22.1%)               |
| Mastitis treatment - recent           | Y/N                                                                  | 37 (20.4%)               |
| Metritis treatment - recent           | Y/N                                                                  | 38 (21.0%)               |
| Metritis treatment - date             |                                                                      | 2 (1.1%)                 |
| Other illness observed                | Y/N                                                                  | 22 (12.2%)               |
| Drop in milk output                   |                                                                      | 11 (6.1%)                |
| Dry cow                               | Y/N                                                                  | 50 (27.6%)               |
| Treated for DHS                       | Y/N                                                                  | 64 (35.4%)               |
| Treatment for DHS - response reported | One of: None, Improvement, Resolution                                | 41 (22.7%)               |

\* Body condition score observations were made by DairyNZ accredited scorers in 21 cases at dry-off, and at DHS diagnosis by a veterinarian in 15 cases, and the farmer in six cases. These six cows were dried off early and fed preferentially due to low BCS in the autumn.

**Supplementary Table 3. Number of cases with serum biochemistry data available from 181 cows diagnosed with dropped hock syndrome in New Zealand between October 2012 and August 2017.**

| Test                      | # cows with test | % cows with test |
|---------------------------|------------------|------------------|
| Sodium mmol/L             | 15               | 8                |
| Potassium mmol/L          | 15               | 8                |
| Chloride mmol/L           | 15               | 8                |
| Creatinine umol/L         | 15               | 8                |
| Urea mmol/L               | 16               | 9                |
| Phosphate mmol/L          | 16               | 9                |
| Total Protein g/L         | 16               | 9                |
| Albumin g/L               | 16               | 9                |
| Globulin g/L              | 15               | 8                |
| A:G <sup>1</sup> ratio    | 15               | 8                |
| Calcium mmol/L            | 16               | 9                |
| Magnesium mmol/L          | 16               | 9                |
| Bilirubin umol/L          | 15               | 8                |
| GGT <sup>2</sup> IU/L     | 15               | 8                |
| GLDH <sup>3</sup> mmol/L  | 15               | 8                |
| B-OHB <sup>4</sup> mmol/L | 15               | 8                |
| AST <sup>5</sup> IU/L     | 22               | 12               |
| CK <sup>6</sup> IU/L      | 21               | 12               |
| Bicarbonate mmol/L        | 11               | 6                |

<sup>1</sup> Albumin:Globulin ratio<sup>2</sup> Gamma-Glutamyl Transferase<sup>3</sup> Glutamate Dehydrogenase<sup>4</sup> Beta-Hydroxybutyrate<sup>5</sup> Aspartate Aminotransferase<sup>6</sup> Creatinine Kinase

**Supplementary Table 4. Number of cases with haematology data available from 181 cows diagnosed with dropped hock syndrome in New Zealand between October 2012 and August 2017.**

| Test                                  | # cows with test | % cows with test |
|---------------------------------------|------------------|------------------|
| RBC <sup>1</sup> x10 <sup>12</sup> /L | 14               | 8                |
| Hb <sup>2</sup> g/L                   | 14               | 8                |
| PCV <sup>3</sup>                      | 14               | 8                |
| MCV <sup>4</sup> fl                   | 14               | 8                |
| MCH <sup>5</sup> pg                   | 14               | 8                |
| MCHC <sup>6</sup> g/L                 | 14               | 8                |
| Platelets x10 <sup>9</sup> /L         | 2                | 1                |
| WBC <sup>7</sup> x10 <sup>9</sup> /L  | 14               | 8                |
| Neutrophil x10 <sup>9</sup> /L        | 14               | 8                |
| Lymphocyte x10 <sup>9</sup> /L        | 14               | 8                |
| Monocyte x10 <sup>9</sup> /L          | 14               | 8                |
| Eosinophil x10 <sup>9</sup> /L        | 14               | 8                |
| Fibrinogen                            | 14               | 8                |

<sup>1</sup> Red blood cells<sup>2</sup> Haemoglobin<sup>3</sup> Packed cell volume<sup>4</sup> Mean corpuscular volume<sup>5</sup> Mean corpuscular haemoglobin<sup>6</sup> Mean corpuscular haemoglobin concentration<sup>7</sup> White blood cells

**Supplementary Table 5. Number of cases with blood and liver trace element results from 181 cows diagnosed with dropped hock syndrome in New Zealand between October 2012 and August 2017.**

| Test                                                | # cows with test | % cows with test |
|-----------------------------------------------------|------------------|------------------|
| Serum Iron $\mu\text{mol/L}$                        | 4                | 2                |
| Serum Copper $\text{nmol/L}$                        | 22               | 12               |
| Blood Selenium $\text{nmol/L}$                      | 3                | 1.5              |
| Serum Selenium $\mu\text{mol/L}$                    | 15               | 7.5              |
| Liver Copper $\mu\text{mol/kg}$                     | 10               | 5                |
| Liver Selenium (quantitative results not available) | 5                | 2.5              |
| Serum Iodine $\mu\text{g/L}$                        | 1                | 0.5              |
